# Supplementary material for: Mixture Effects of Estrogenic Pesticides at the Human Estrogen Receptor α and β
Source: PLOS journal article supplement (doi:10.1371/journal.pone.0147490), 2016-01-26
Supplement: S7 (10.1371/journal.pone.0147490.s007) [file journal.pone.0147490.s007]

| Mixture ratios (percentages) |              |        |        |
|------------------------------|--------------|--------|--------|
| test system                  | compound     | EC01   | EC10   |
| ER $\alpha$ CALUX            | fenhexamid   | 62.81% | 67.61% |
|                              | fludioxonil  | 37.19% | 32.39% |
| YES                          | fenhexamid   | 20.84% | 44.86% |
|                              | fludioxonil  | 79.16% | 55.14% |
| ER $\alpha$ CALUX            | fenhexamid   | 38.48% | 35,73% |
|                              | fludioxonil  | 22.79% | 17.12% |
|                              | chlorpyrifos | 38.73% | 47.15% |
| YES                          | fenhexamid   | 19.37% | -      |
|                              | fludioxonil  | 73.60% |        |
|                              | chlorpyrifos | 7.02%  |        |
| ER $\alpha$ CALUX            | fenhexamid   | 51.73% | 57.00% |
|                              | fludioxonil  | 30.63% | 27.31% |
|                              | propamocarb  | 17.64% | 15.69% |
| ER $\alpha$ CALUX            | fenhexamid   | 62.81% | 67.61% |
|                              | fludioxonil  | 37.19% | 32.39% |
| YES                          | fenhexamid   | 20.84% | 44.86% |
|                              | fludioxonil  | 79.16% | 55.14% |
|                              |              | EC101  | EC110  |
| YES                          | chlorpyrifos | 33.89% | 47.14% |
|                              | fenarimol    | 66.11% | 52.86% |
|                              |              | EC01   | EC10   |
| ER $\beta$ CALUX             | fenhexamid   | 56.77% | 70.56% |
|                              | fludioxonil  | 43.23% | 29.44% |
| ER $\beta$ CALUX             | fenhexamid   | 8.63%  | 15%    |
|                              | fludioxonil  | 6.57%  | 6.26%  |
|                              | propamocarb  | 84.80% | 78.74% |
